# Supplementary material
Source: Springer Nature journal article supplement (https://www.springermedizin.de/resource/supplementary/12933_2013_798_MOESM5_ESM.pdf/9539246)

**A**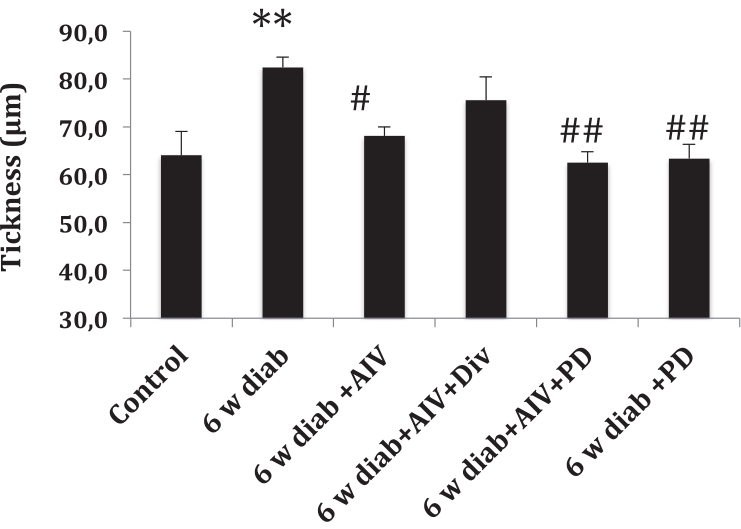**B**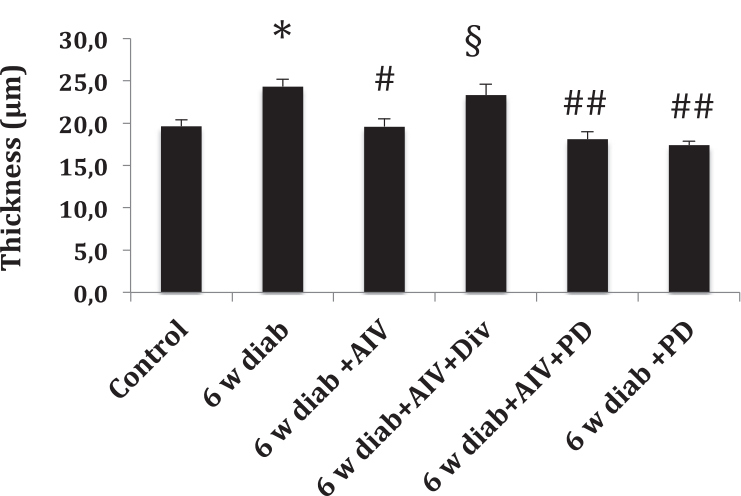

Supplement: MOESM5 [file 9539246]
